# Supplementary material
Source: publisher figshare collection journal article supplement (https://frontiersin.figshare.com/ndownloader/files/14699774)
Supplement: Supplementary file [file 14699774]

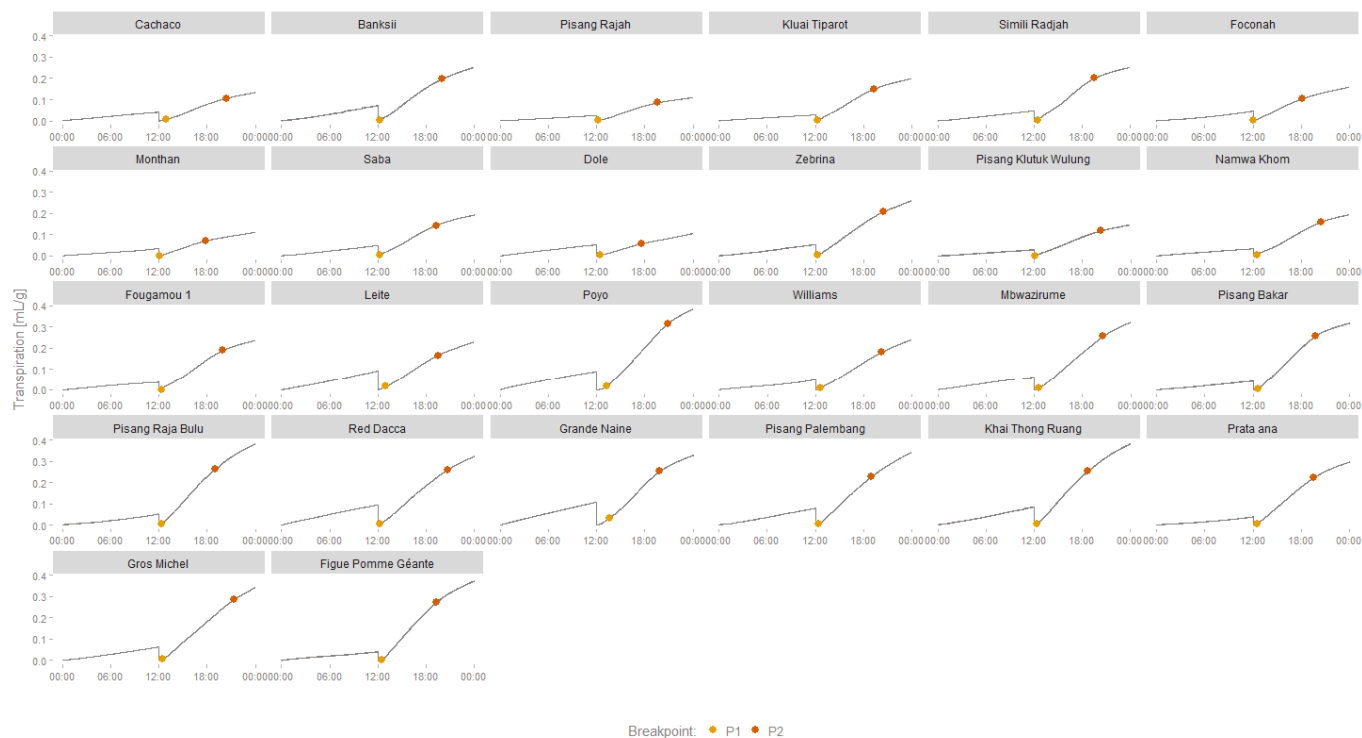

**Supplementary figure 2:** Per genotype the cumulative transpiration pattern of one sampled plant on one sample day is displayed, illustrating the variability between genotypes. The breakpoints (P1 and P2) from segmented regression analysis are indicated.
